# Supplementary material for: Procalcitonin Evaluation of Antibiotic Use in COVID-19 Hospitalised Patients (PEACH): Protocol for a Retrospective Observational Study
Source: MDPI journal article supplement (doi:10.3390/mps5060095), 2022-11-28
Supplement: s1 [file s1]

# Procalcitonin Evaluation of COVID-19 Hospitalised patients (PEACH): protocol for a retrospective observational study.

## Supplementary File

**Table S1 –Variables to be collected for analysis.**

| Variable  | Measure                                                                                                                                                                                                                                                                                                                                                                                                                                                                                                                                                                                                                                                                                                                                                                                                                                                                                   | Reason                                                                                                                         |
|-----------|-------------------------------------------------------------------------------------------------------------------------------------------------------------------------------------------------------------------------------------------------------------------------------------------------------------------------------------------------------------------------------------------------------------------------------------------------------------------------------------------------------------------------------------------------------------------------------------------------------------------------------------------------------------------------------------------------------------------------------------------------------------------------------------------------------------------------------------------------------------------------------------------|--------------------------------------------------------------------------------------------------------------------------------|
| Day 1     | Date of COVID-19 diagnosis                                                                                                                                                                                                                                                                                                                                                                                                                                                                                                                                                                                                                                                                                                                                                                                                                                                                | To define reference point for analysis and to define 'baseline' (Day 1 +/- 1 day) for variable collection at time of diagnosis |
| Age       | Age category: <ul style="list-style-type: none"> <li>• 16-49</li> <li>• 50-59</li> <li>• 60-69</li> <li>• 70-79</li> <li>• &gt;80</li> </ul>                                                                                                                                                                                                                                                                                                                                                                                                                                                                                                                                                                                                                                                                                                                                              | Confounding factor, describe study population (Exploratory analysis)                                                           |
| Ethnicity | Category: <ul style="list-style-type: none"> <li>• White: Welsh/English/Scottish/Northern Irish/British</li> <li>• White: Irish</li> <li>• White: Gypsy or Irish Traveller</li> <li>• White: Any other White background</li> <li>• Mixed/Multiple ethnic groups: White and Black Caribbean</li> <li>• Mixed/Multiple ethnic groups: White and Black African</li> <li>• Mixed/Multiple ethnic groups: White and Asian</li> <li>• Mixed/Multiple ethnic groups: Any other Mixed / Multiple ethnic background</li> <li>• Asian/Asian British: Indian</li> <li>• Asian/Asian British: Pakistani,</li> <li>• Asian/Asian British: Bangladeshi</li> <li>• Asian/Asian British: Chinese,</li> <li>• Asian/Asian British: Any other Asian background</li> <li>• Black / African / Caribbean / Black British: African</li> <li>• Black / African / Caribbean / Black British: Caribbean</li> </ul> | Baseline Characteristics                                                                                                       |

|                                                         |                                                                                                                                                                                                                                                                                                                                                                                                       |                                                                                                                                  |
|---------------------------------------------------------|-------------------------------------------------------------------------------------------------------------------------------------------------------------------------------------------------------------------------------------------------------------------------------------------------------------------------------------------------------------------------------------------------------|----------------------------------------------------------------------------------------------------------------------------------|
|                                                         | <ul style="list-style-type: none"> <li>Black / African / Caribbean / Black British: Any other Black / African / Caribbean background</li> <li>Other ethnic group: Arab</li> <li>Any other ethnic group</li> </ul>                                                                                                                                                                                     |                                                                                                                                  |
| Sex                                                     | Male/female                                                                                                                                                                                                                                                                                                                                                                                           | Baseline Characteristics                                                                                                         |
| Height and Weight                                       | (i) Height and date measured<br>(ii) Weight and date measured                                                                                                                                                                                                                                                                                                                                         | Baseline Characteristics                                                                                                         |
| Comorbidity                                             | (i) Quality Outcome Framework registered conditions<br>(ii) Primary Care Frailty Scores:<br>1 Very Fit<br>2 Well<br>3 Managing well<br>4 Vulnerable<br>5 Mildly Frail<br>6 Moderately Frail<br>7 Severely Frail<br>8 Very Severely Frail<br>9 Terminally Ill<br>(iii) Penicillin allergy or sensitivity status:<br><ul style="list-style-type: none"> <li>Yes</li> <li>No</li> <li>Unknown</li> </ul> | Confounding factors (Baseline Characteristics)                                                                                   |
| Smoking status                                          | Category:<br><ul style="list-style-type: none"> <li>No</li> <li>Yes</li> <li>Ex-Smoker</li> <li>Not Known</li> </ul>                                                                                                                                                                                                                                                                                  | Baseline Characteristics                                                                                                         |
| Index of multiple deprivation (IMD)                     | (i) IMD - Score<br>(ii) IMD - Rank<br>(iii) IMD – Decile                                                                                                                                                                                                                                                                                                                                              | Confounding factor (Exploratory analysis)                                                                                        |
| Antibiotics/Antivirals used during treatment of episode | (i) Agent<br>(ii) Dose<br>(iii) Route<br>(iv) Frequency<br>(v) Start date<br>(vi) Stop date                                                                                                                                                                                                                                                                                                           | Primary and secondary outcomes -<br>Used to derive: days and DDDs of ‘early’, ‘late’ and total antibiotic treatment.             |
| Date of hospital admission/discharge                    | (i) Date of hospital admission and discharge<br>(ii) Date of ICU admission and discharge<br><b>(iii) Date of death</b>                                                                                                                                                                                                                                                                                | Secondary outcomes -<br>Used to derive: days - length of hospital stay, ICU length of stay, and mortality rates (Survival time). |
| Resuscitation status and level of care preference       | Categories:<br>(i) Documented decision about resuscitation status:<br><ul style="list-style-type: none"> <li>Yes/No</li> </ul> (ii) Documented decision regarding level of care:<br><ul style="list-style-type: none"> <li>Yes/No</li> </ul>                                                                                                                                                          | Confounding factor                                                                                                               |

|                                                                                       |                                                                                                                                                                                                                                                                                                                                                                                                                                                             |                                                                                                                                          |
|---------------------------------------------------------------------------------------|-------------------------------------------------------------------------------------------------------------------------------------------------------------------------------------------------------------------------------------------------------------------------------------------------------------------------------------------------------------------------------------------------------------------------------------------------------------|------------------------------------------------------------------------------------------------------------------------------------------|
|                                                                                       | (iii) Decision in the event of a cardiorespiratory arrest: <ul style="list-style-type: none"> <li>• No (do not resuscitate)</li> <li>• Yes (resuscitate)</li> </ul>                                                                                                                                                                                                                                                                                         |                                                                                                                                          |
| Presence and location of consolidation/ ground glass changes on lung imaging          | (i) COVID-19 categorisation of imaging: <ul style="list-style-type: none"> <li>• X-ray uncoded</li> <li>• Definite (CVCX1)</li> <li>• Normal (CVCX0)</li> <li>• Indefinite (CVCX2)</li> <li>• Typical (non-COVID CVCX3)</li> </ul> (ii) Date of Baseline Imaging<br>(iii) Date of imaging where new/worsening consolidation identified                                                                                                                      | Confounder and secondary outcomes –<br>Dates used to derive: Time to new consolidation                                                   |
| Physiological observations at time of diagnosis (day 1 = Positive COVID-19 test date) | (i) Respiratory rate<br>(ii) Systolic blood pressure<br>(iii) Pulse rate<br>(iv) ACVPU<br>(v) Glasgow coma score<br>(vi) Temperature<br>(vii) Oxygen saturation<br>(viii) Oxygen requirement (was supplemental oxygen given?)                                                                                                                                                                                                                               | Confounding factor -<br>Used to derive:<br>(i) qSOFA<br>(ii) NEWS2 score<br>(iii) CURB-65 scores<br>(iv) 4C mortality score              |
| Laboratory tests:                                                                     | (i) Positive COVID-19 test date (day 1)<br><br>(ii) PCT test date                                                                                                                                                                                                                                                                                                                                                                                           | Primary Outcome -<br>Week of test date.<br><br>Secondary Outcome -<br>Study test, within 3 days of COVID test for inclusion in PCT group |
| Laboratory tests                                                                      | At baseline (day 1 or +/- 1 day COVID-19 positive test date): <ul style="list-style-type: none"> <li>• Urea</li> <li>• C-reactive protein</li> <li>• Troponin</li> <li>• Ferritin</li> <li>• D-dimer</li> <li>• White cell count</li> <li>• Lymphocyte count</li> <li>• Neutrophil count</li> <li>• Haemoglobin</li> <li>• Platelets</li> </ul> Day 1, day 2 and day 3: <ul style="list-style-type: none"> <li>• Creatinine</li> <li>• AKI stage</li> </ul> | Confounding factors (Exploratory analysis)                                                                                               |
| Laboratory tests                                                                      | Microbiology at baseline (day 1 or +/- 1 day COVID-19 positive test date) or                                                                                                                                                                                                                                                                                                                                                                                | Secondary Outcomes -                                                                                                                     |

|                  |                                                                                                                                                            |                                                                       |
|------------------|------------------------------------------------------------------------------------------------------------------------------------------------------------|-----------------------------------------------------------------------|
|                  | follow-up. Results and date of sampling for:<br>(i) Blood culture<br>(ii) Respiratory (Bronchoscopy/BAL cultures)<br>(iii) Sterile site culture            | Used to derive resistant bacterial infection rates and time to event. |
| Laboratory tests | (i) GDH ELISA results<br>(ii) <i>C. difficile</i> toxin and toxin gene testing results<br>(iii) Presence of Respiratory virus or secondary viral infection | Secondary Outcomes                                                    |
